# Supplementary material for: Enhancing Cardiovascular Disease Prediction: A Domain Knowledge-Based Feature Selection and Stacked Ensemble Machine Learning Approach
Source: Research Square preprint supplement (doi:10.21203/rs.3.rs-3068941/v1), 2023-06-26
Supplement: Supplementary file 1 [file bfebe5374adb54e41d4e2743.docx]

Enhancing Cardiovascular Disease Prediction: A Domain Knowledge-Based Feature Selection and Stacked Ensemble Machine Learning Approach

Zahiriddin Rustamov 1,*, Jaloliddin Rustamov 1, Nazar Zaki 1,2, Sherzod Turaev 1,*, Most Sarmin Sultana 3, Jeanne Ywei Tan 3 and Vimala Balakrishnan 3

1 Department of Computer Science and Software Engineering, College of Information Technology, United Arab Emirates University, 15551 Al Ain, United Arab Emirates

2 ASPIRE Research Institute, Abu Dhabi, United Arab Emirates

3 Department of Information Systems, Faculty of Computer Science and Information Technology, University Malaya, 50603 Kuala Lumpur, Malaysia

***** Correspondence: contact@zahiriddin.com (Zahiriddin Rustamov); sherzod@uaeu.ac.ae (Sherzod Turaev)

**Table S1.** A comprehensive summary of the conducted literature review on the studies utilizing ML for predicting cardiovascular disease.

| **Author(s)** | **Dataset** | **Total Observations** | **No. of Features** | **Data Splitting** | **Sampling** | **Feature Selection** | **Classifier** | **Accuracy** | **F1-Score** |
| --- | --- | --- | --- | --- | --- | --- | --- | --- | --- |
| [1] | Cleveland | 303 | 5 | 10-fold | - | Mean Fisher & Accuracy-based | SVM | 83.10% | - |
| Hungarian | 283 | 5 | 10-fold | 83.90% | - |
| Switzerland | 123 | 2 | 8-fold | 92.10% | - |
| UCI Heart Disease* | 709 | 5 | 10-fold | 84.20% | - |
| [2] | UCI Heart Disease | 1025 | 13 | 5-fold | - | - | XGBoost | 99.03% | 99.00% |
| [3] | Cleveland | 303 | - | - | - | LASSO | Deep Learning | 94.20% | - |
| [4] | UCI Heart Disease | 1025 | 13 | 80:20 | - | Recursive Feature Elimination | Stacking Ensemble | 97.17% | 97.15% |
| CDC Heart Disease | 57,373 | 18 | 78.81% | 78.81% |
| [5] | Cleveland | 303 | 6 | 75:25 | - | Chi-Squared Test | SVM | 89.47% | 89.40% |
| StatLog | 270 | 6 | 89.70% | 89.70% |
| [6] | Cleveland | 303 | 8 | 10-fold | - | Relief | Cost-Sensitive Ensemble | - | 89.17% |
| Hungarian | 294 | 5 | 85.71% |
| StatLog | 270 | 6 | 92.37% |
| [7] | UCI Heart Disease & StatLog | 1,190 | 11 | 80:20 | - | LASSO | Random Forest | 100.0% | 100.0% |
| [8] | UCI Heart Disease & StatLog | 918 | 11 | 80:20 | - | Gradient Boosting Decision Tree + SHAP | Stacking Ensemble | 89.86% | 91.36% |
| [9] | Cleveland, StatLog & Z-Alizadeh Sani | 876 | 13 | 10-fold | - | - | SVM | 96.72% | 96.00% |
| [10] | Z-Alizadeh Sani | 303 | 27 | 10-fold | - | Particle Swarm Optimization | Stacking Ensemble | 98.13% | 96.60% |
| StatLog | 261 | 8 | 93.55% | 91.67% |
| Cleveland | 303 | 7 | 85.71% | 86.49% |
| Hungarian | 294 | 6 | 91.18% | 90.91% |
| [11] | Framingham | 4,238 | - | 80:20 | Over | Covariance | Decision Tree | 92.59% | 94.08% |
| [12] | Framingham | 4,240 | 8 | 80:20 | ROSE | Multiple Logistic Regression | Boosted Decision Tree | 85.00% | 10.86% |
| [13] | Framingham | 4,240 | - | 80:20 | SMOTE | SelectKBest | Random Forest | 94.63% | - |
| [14] | Framingham | 4,238 | 15 | 70:30 | - | - | Randomized Decision Tree | 91.00% | 91.00% |
| Cleveland | 303 | 13 | 93.00% | 93.00% |
| [15] | Faisalabad Institute | 299 | 4 | 10-fold | - | Random Forest | Decision Tree | 76.59% | 63.59% |
| Framingham | 3,658 | 4 | LGBM | 83.10% | - |
| Cleveland | 303 | 4 | SVM | 81.16% | 83.33% |
| South African Heart | 462 | 2 | Decision Tree | 72.51% | 55.20% |
| [16] | Framingham  Cleveland  CVD Kaggle | 4,240 | 5 | 10-fold | SMOTE | SelectKBest | Boosting Ensemble | 99.10%  98.00%  95.50% | - |
| 303 | 5 | - |
| - | 5 | - |
| [17] | UCI Heart Disease |  | 13 | - | SMOTE | - | Stacking Ensemble | 95.83% | 96.00% |
| Framingham | 4,240 | 15 | 90.24% | 90.00% |

**References:**

[1] S. M. S. Shah, F. A. Shah, S. A. Hussain, and S. Batool, “Support Vector Machines-based Heart Disease Diagnosis using Feature Subset, Wrapping Selection and Extraction Methods,” *Comput. Electr. Eng.*, vol. 84, p. 106628, Jun. 2020, doi: 10.1016/j.compeleceng.2020.106628.

[2] G. N. Ahmad, H. Fatima, Shafiullah, A. Salah Saidi, and Imdadullah, “Efficient Medical Diagnosis of Human Heart Diseases Using Machine Learning Techniques with and Without GridSearchCV,” *IEEE Access*, vol. 10, no. March, pp. 80151–80173, 2022, doi: 10.1109/ACCESS.2022.3165792.

[3] R. Bharti, A. Khamparia, M. Shabaz, G. Dhiman, S. Pande, and P. Singh, “Prediction of Heart Disease Using a Combination of Machine Learning and Deep Learning,” *Comput. Intell. Neurosci.*, vol. 2021, 2021, doi: 10.1155/2021/8387680.

[4] A. Almulihi *et al.*, “Ensemble Learning Based on Hybrid Deep Learning Model for Heart Disease Early Prediction,” *Diagnostics*, vol. 12, no. 12, p. 3215, Dec. 2022, doi: 10.3390/diagnostics12123215.

[5] R. R. Sarra, A. M. Dinar, M. A. Mohammed, and K. H. Abdulkareem, “Enhanced Heart Disease Prediction Based on Machine Learning and χ2 Statistical Optimal Feature Selection Model,” *Designs*, vol. 6, no. 5, p. 87, Sep. 2022, doi: 10.3390/designs6050087.

[6] Q. Zhenya and Z. Zhang, “A hybrid cost-sensitive ensemble for heart disease prediction,” *BMC Med. Inform. Decis. Mak.*, vol. 21, no. 1, p. 73, Dec. 2021, doi: 10.1186/s12911-021-01436-7.

[7] S. Mohamed, M. Malhat, and G. Elhady, “Prediction of Cardiovascular Disease Using Machine Learning Techniques,” *IJCI. Int. J. Comput. Inf.*, vol. 17, no. 1, pp. 0–0, Jun. 2022, doi: 10.21608/ijci.2022.129472.1071.

[8] J. Liu, X. Dong, H. Zhao, and Y. Tian, “Predictive Classifier for Cardiovascular Disease Based on Stacking Model Fusion,” *Processes*, vol. 10, no. 4, p. 749, Apr. 2022, doi: 10.3390/pr10040749.

[9] A. Saboor, M. Usman, S. Ali, A. Samad, M. F. Abrar, and N. Ullah, “A Method for Improving Prediction of Human Heart Disease Using Machine Learning Algorithms,” *Mob. Inf. Syst.*, vol. 2022, pp. 1–9, Mar. 2022, doi: 10.1155/2022/1410169.

[10] B. A. Tama, S. Im, and S. Lee, “Improving an Intelligent Detection System for Coronary Heart Disease Using a Two-Tier Classifier Ensemble,” *Biomed Res. Int.*, vol. 2020, 2020, doi: 10.1155/2020/9816142.

[11] J. Patel, A. A. Khaked, J. Patel, and J. Patel, “Heart Disease Prediction Using Machine Learning,” in *Springer*, vol. 203, 2021, pp. 653–665. doi: 10.1007/978-981-16-0733-2_46.

[12] J. J. Beunza *et al.*, “Comparison of machine learning algorithms for clinical event prediction (risk of coronary heart disease),” *J. Biomed. Inform.*, vol. 97, no. July, p. 103257, 2019, doi: 10.1016/j.jbi.2019.103257.

[13] K. Kwakye and E. Dadzie, “Machine Learning-Based Classification Algorithms for the Prediction of Coronary Heart Diseases,” Dec. 2021, [Online]. Available: http://arxiv.org/abs/2112.01503

[14] I. D. Mienye, Y. Sun, and Z. Wang, “An improved ensemble learning approach for the prediction of heart disease risk,” *Informatics Med. Unlocked*, vol. 20, p. 100402, 2020, doi: 10.1016/j.imu.2020.100402.

[15] L. R. Guarneros-Nolasco, N. A. Cruz-Ramos, G. Alor-Hernández, L. Rodríguez-Mazahua, and J. L. Sánchez-Cervantes, “Identifying the Main Risk Factors for Cardiovascular Diseases Prediction Using Machine Learning Algorithms,” *Mathematics*, vol. 9, no. 20, p. 2537, Oct. 2021, doi: 10.3390/math9202537.

[16] A. Rahim, Y. Rasheed, F. Azam, M. W. Anwar, M. A. Rahim, and A. W. Muzaffar, “An Integrated Machine Learning Framework for Effective Prediction of Cardiovascular Diseases,” *IEEE Access*, vol. 9, pp. 106575–106588, 2021, doi: 10.1109/ACCESS.2021.3098688.

[17] N. Louridi, S. Douzi, and B. El Ouahidi, “Machine learning-based identification of patients with a cardiovascular defect,” *J. Big Data*, vol. 8, no. 1, p. 133, Dec. 2021, doi: 10.1186/s40537-021-00524-9.
